# Supplementary material for: Silver and Hematite Nanoparticles Had a Limited Effect on the Bacterial Community Structure in Soil Cultivated with Phaseolus vulgaris L.
Source: MDPI journal article supplement (doi:10.3390/agronomy13092341), 2023-09-08
Supplement: s1 [file s1]

**Silver and hematite nanoparticles had a limited effect on the bacterial community structure in soil cultivated with *Phaseolus vulgaris* L.**

Karla E. Zarco-González (estephaniazg.130897@gmail.com) <sup>1</sup>, Jessica D. Valle-García (jd.valleg@gmail.com) <sup>1</sup>, Yendi E. Navarro-Noya (yendiebenezer.navarro.n@uatx.mx) <sup>2</sup>, Fabián Fernández-Luqueño (cinves.cp.cha.luqueno@gmail.com) <sup>3</sup>, Luc Dendooven (dendooven@me.com) <sup>1\*</sup>

<sup>1</sup> Laboratory of Soil Ecology, CINVESTAV, CP 07360, Mexico City, Mexico,

<sup>2</sup> Laboratorio de Interacciones Bióticas, Centro de Investigación en Ciencias Biológicas, Universidad Autónoma de Tlaxcala, Tlaxcala, Tlaxcala, Mexico,

<sup>3</sup> Sustainability of Natural Resources and Energy Programs, CINVESTAV, Saltillo, México.

\* Corresponding author:

Luc Dendooven, E-mail address: dendooven@me.com

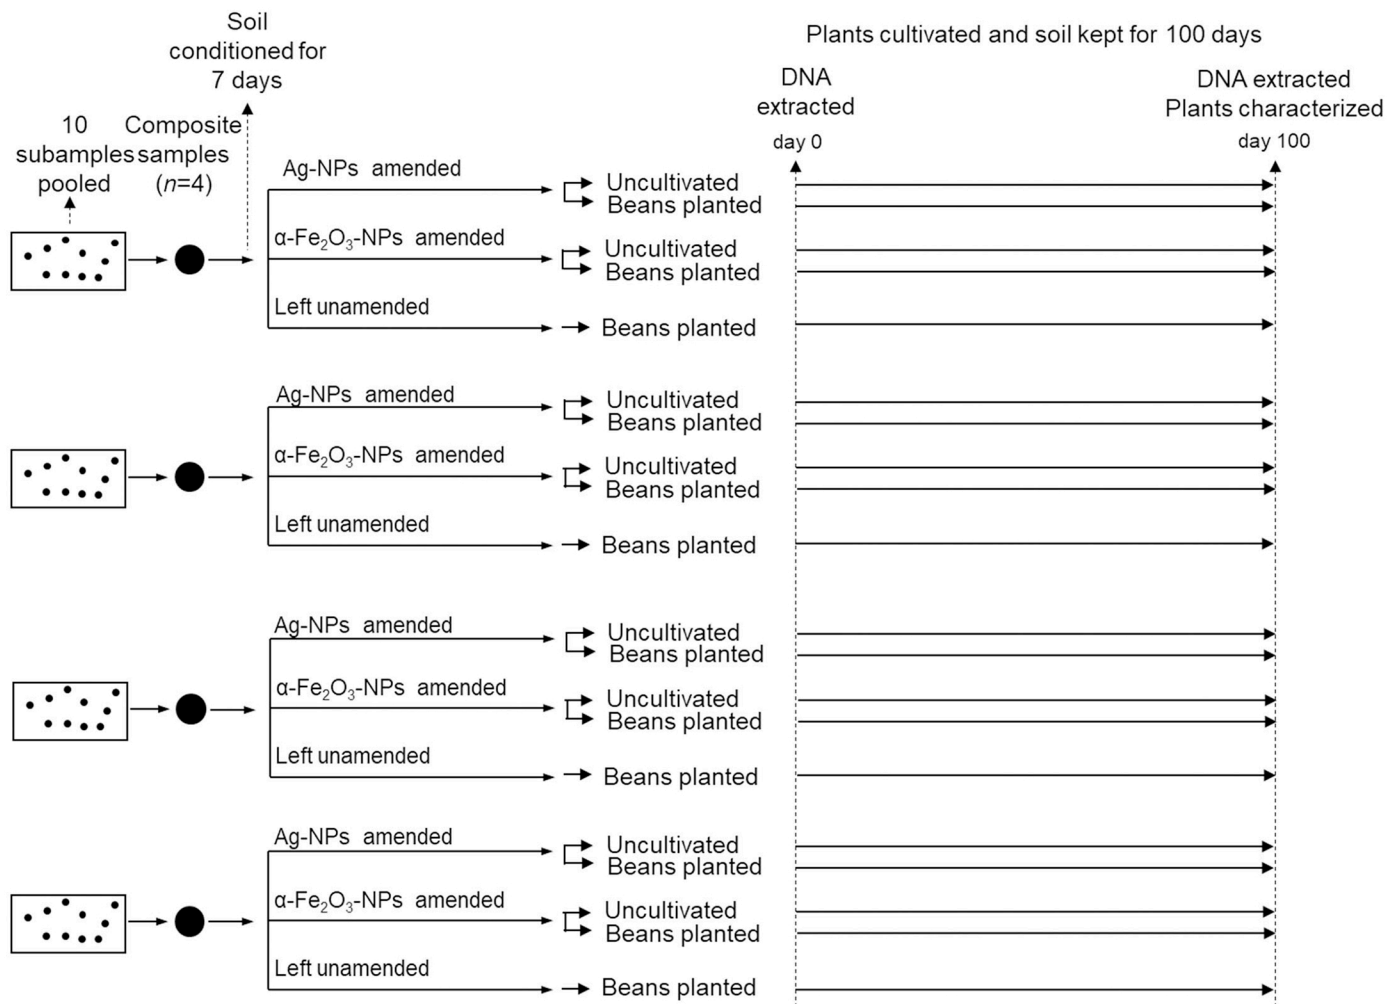

**Figure S1.** Soil sampling, experimental design and characterization



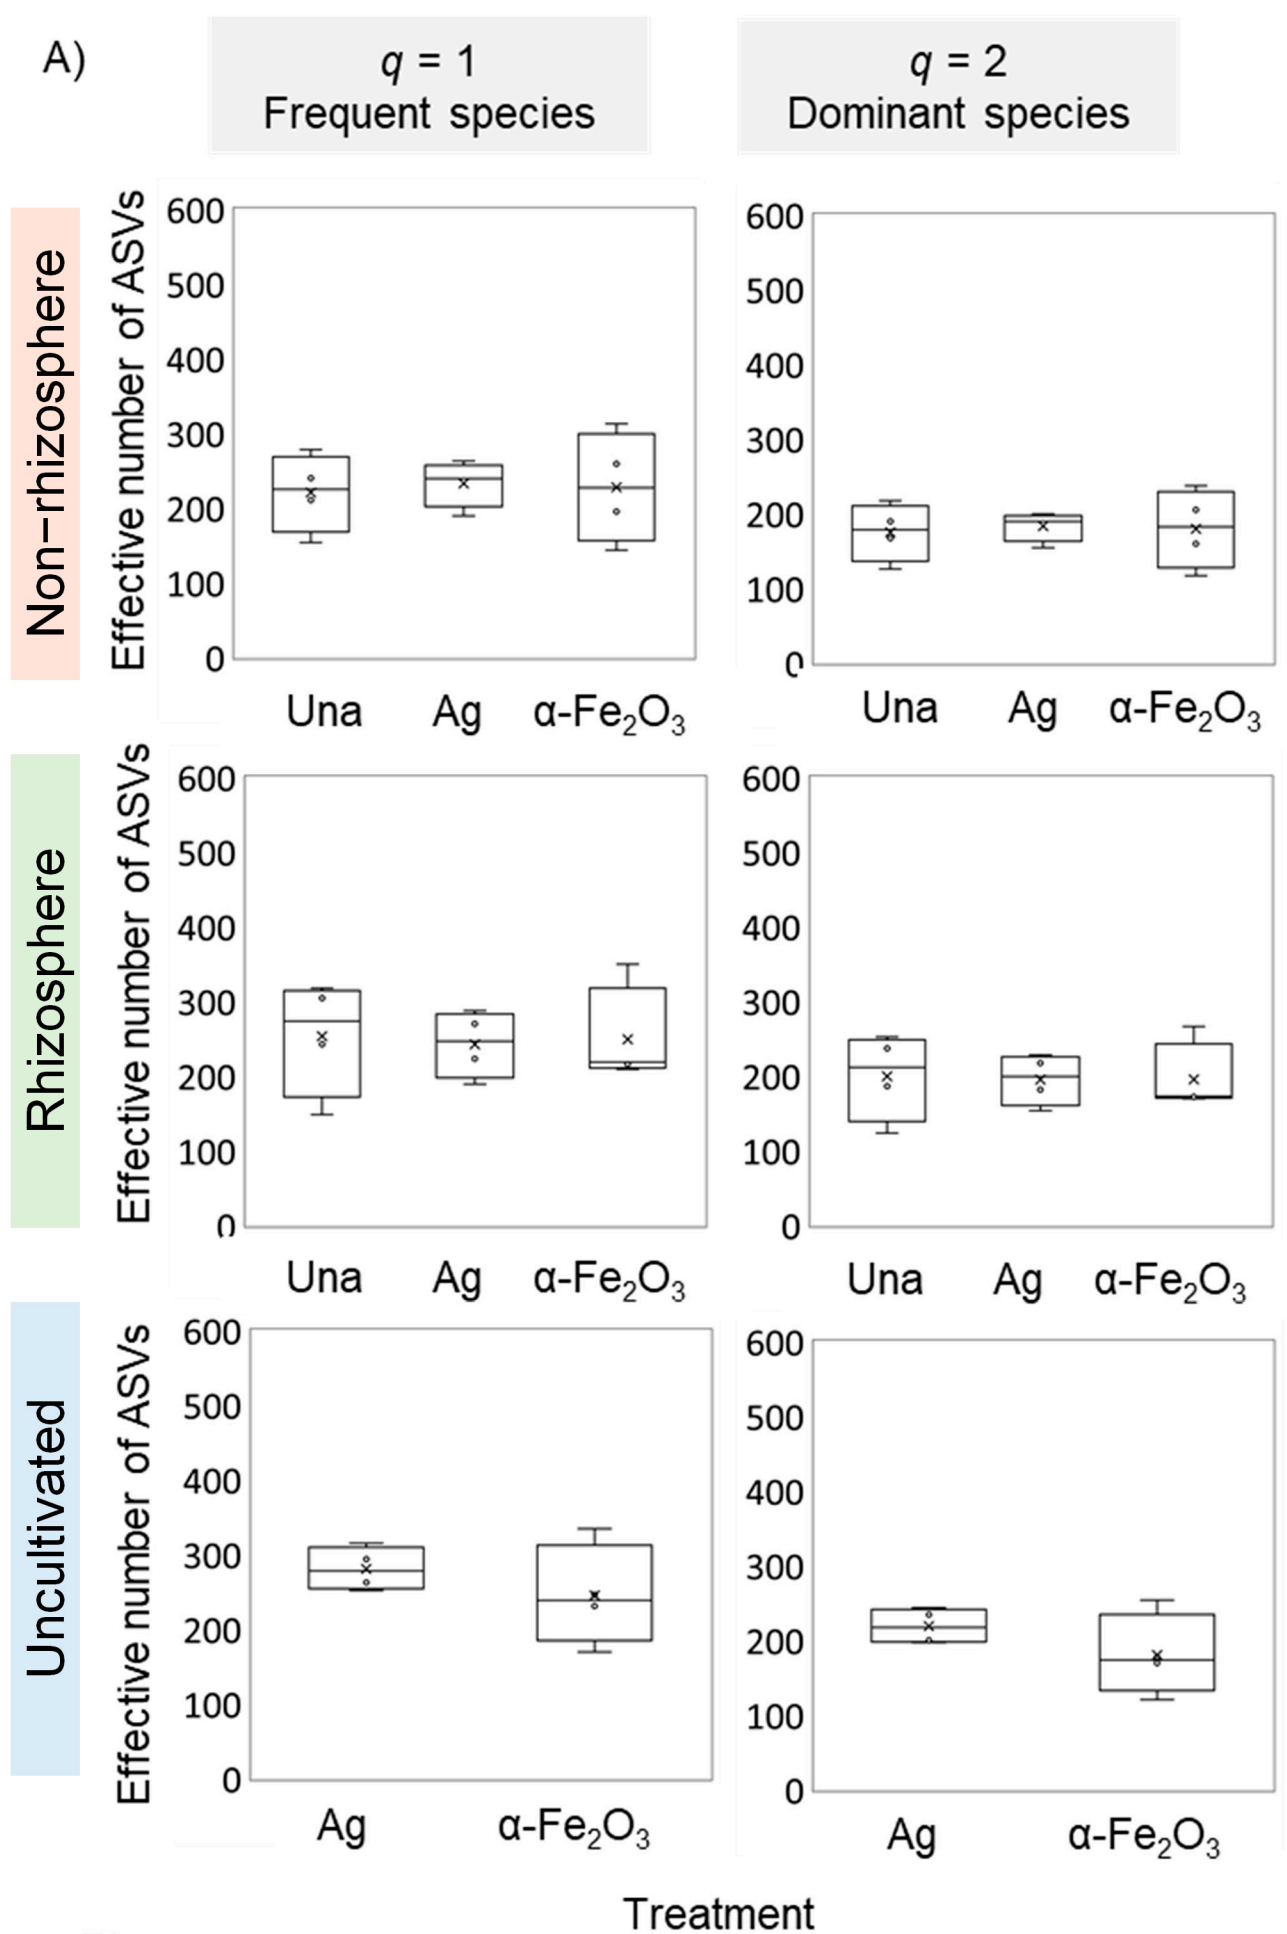

B)

| <i>p</i> values |         |         |
|-----------------|---------|---------|
|                 | $q = 1$ | $q = 2$ |
| Non-rhizosphere | 0.981   | 0.981   |
| Rhizosphere     | 0.874   | 0.874   |
| Uncultivated    | 0.248   | 0.248   |

**Figure S2.** Alpha diversity of the soil bacterial amplicon sequence variants (ASVs). A) Boxplots of effective number of ASVs at  $q = 1$  and  $q = 2$  in the non-rhizosphere, rhizosphere and uncultivated soil left unamended (Una) or amended with Ag-NPs (Ag) or  $\alpha\text{-Fe}_2\text{O}_3$ -NPs ( $\alpha\text{-Fe}_2\text{O}_3$ ) and B) a Kruskal-Wallis test applied to determine the effect of nanoparticles on  $q = 1$  and  $q = 2$  in the non-rhizosphere, rhizosphere and uncultivated soil.

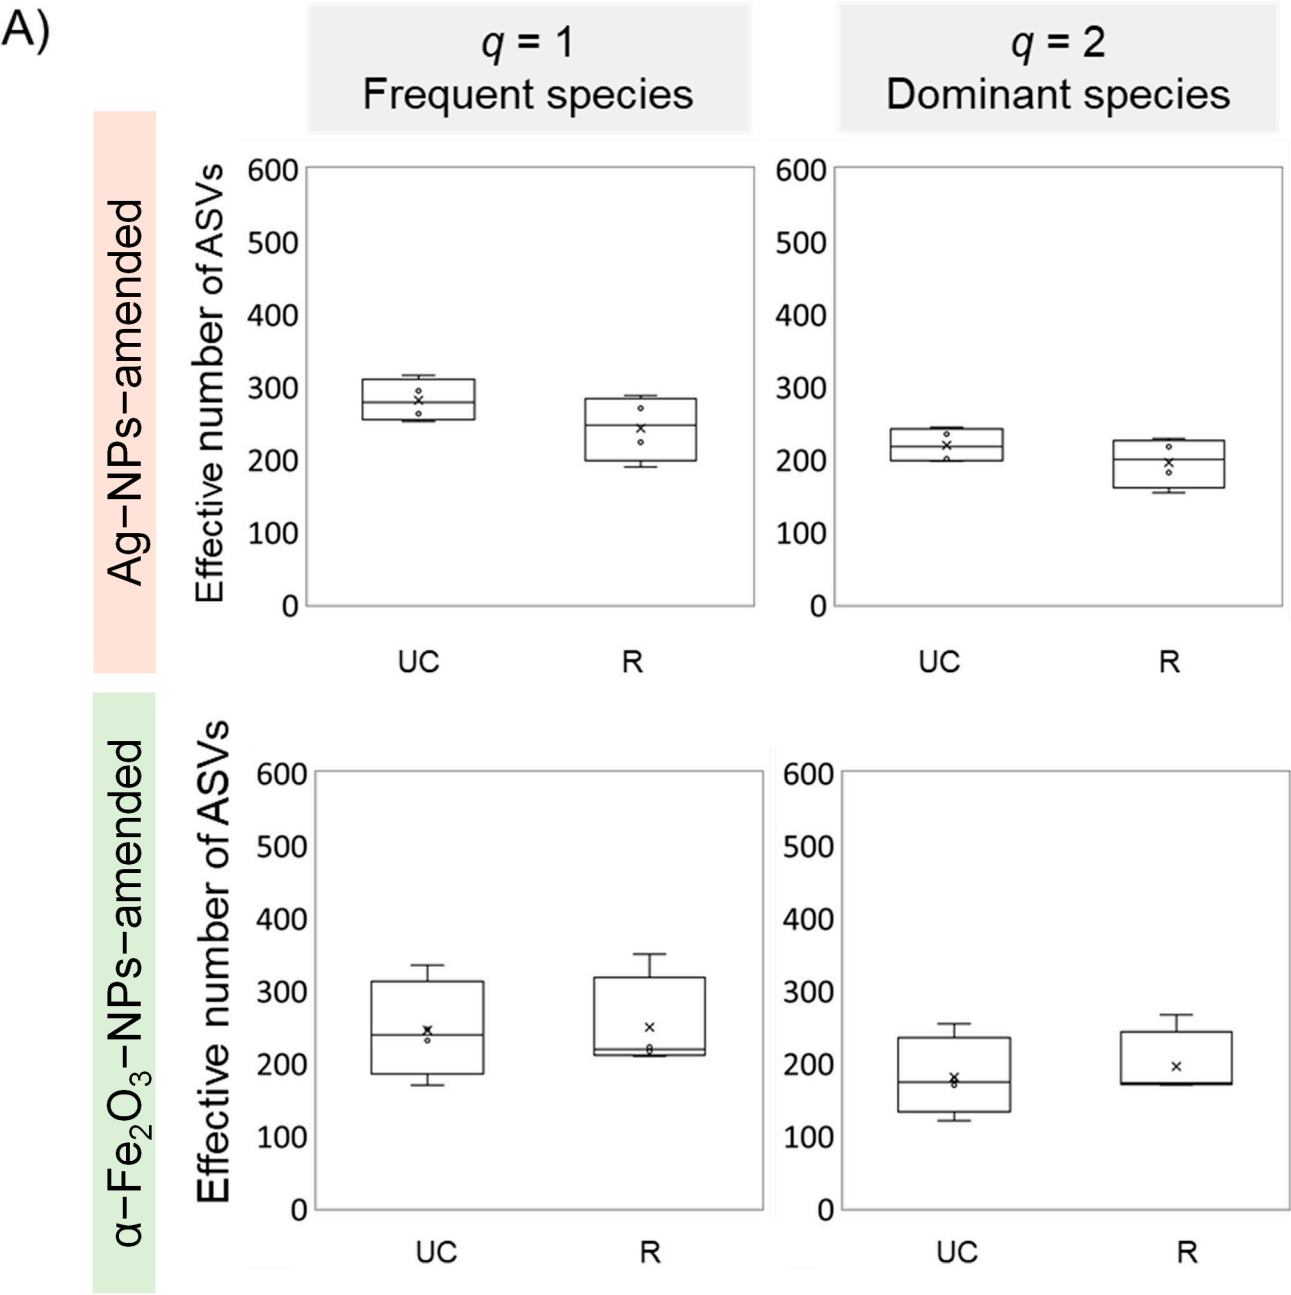

B)

| <i>p</i> values                                       |              |              |
|-------------------------------------------------------|--------------|--------------|
|                                                       | <i>q</i> = 1 | <i>q</i> = 2 |
| Ag-NPs-amended                                        | 0.248        | 0.248        |
| $\alpha$ -Fe <sub>2</sub> O <sub>3</sub> -NPs-amended | 0.773        | 0.564        |

**Figure S3.** Effect of cultivation of beans (*Phaseolus vulgaris* L.) (rhizosphere (R) versus uncultivated (UC) soil) on the alpha diversity of the soil bacterial amplicon sequence variants (ASVs). A) Boxplots of effective number of ASVs at  $q = 1$  and  $q = 2$  in soil amended with Ag-NPs or  $\alpha$ -Fe<sub>2</sub>O<sub>3</sub>-NPs and B) a Kruskal-Wallis test applied to determine the effect of cultivation of bean plants (rhizosphere versus uncultivated soil) on  $q = 1$  and  $q = 2$  in the Ag-NPs or  $\alpha$ -Fe<sub>2</sub>O<sub>3</sub>-NPs amended soil.

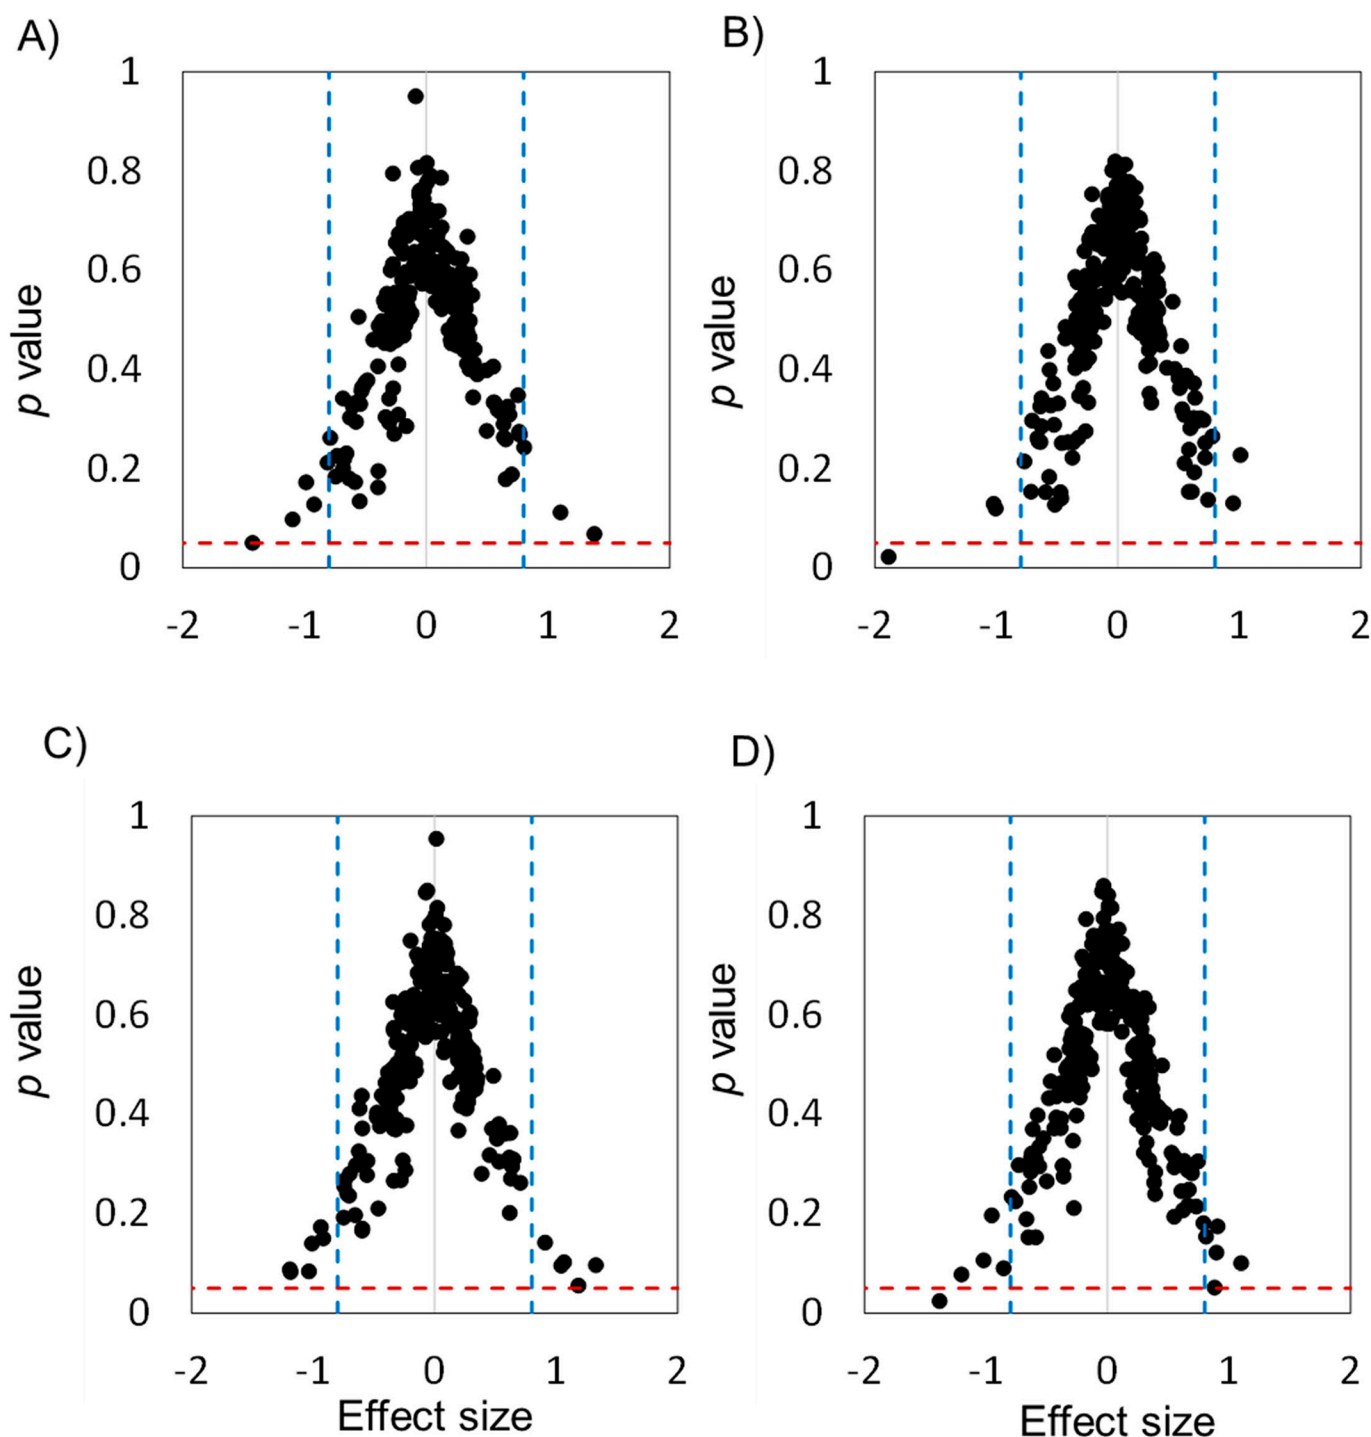

**Figure S4.** Volcano plot comparing the relative abundance of bacterial groups assigned up to the taxonomic level of genus in A) the Ag-NPs amended non-rhizosphere versus the unamended non-rhizosphere soil, B) the Ag-NPs amended rhizosphere versus the unamended rhizosphere soil, C) the unamended non-rhizosphere soil versus the  $\alpha$ -Fe<sub>2</sub>O<sub>3</sub>-NPs amended non-rhizosphere and D) the unamended rhizosphere soil versus the  $\alpha$ -Fe<sub>2</sub>O<sub>3</sub>-NPs amended rhizosphere. The expected  $p$  value of the Kruskal-Wallis test is given in the y-axis and the effect size is given in the x-axis [38]. The effect size, which is defined as the difference between groups divided by the maximum dispersion within group A or B, was calculated with the ALDEx2 package using the `aldex.ttest` argument. A negative value indicates that the relative abundance of the microbial group was higher in the first mentioned soil than in the second mentioned soil and a positive value the opposite. Blue dotted line indicates a large effect ( $\leq -0.8$  and  $\geq 0.8$ , [37]) and a red dotted line  $p = 0.05$ .

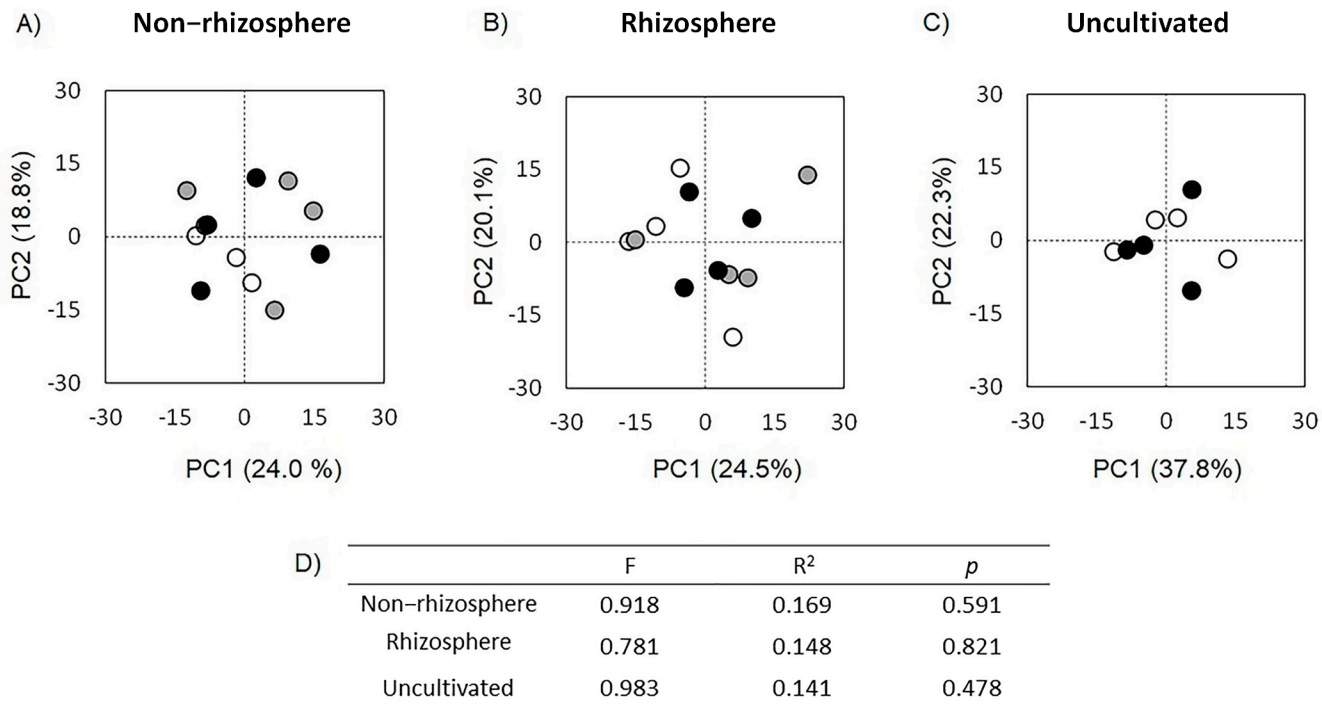

**Figure S5.** Principal component analysis (PCA) with all the putative metabolic functions in the A) non-rhizosphere, B) rhizosphere and C) uncultivated soil left unamended (○), or amended with Ag-NPs (○) or  $\alpha$ -Fe<sub>2</sub>O<sub>3</sub>-NPs (●) and D) a permutational analysis of variance (perMANOVA) test to determine the effect of application of the different nanoparticles on the putative metabolic functions at day 100.

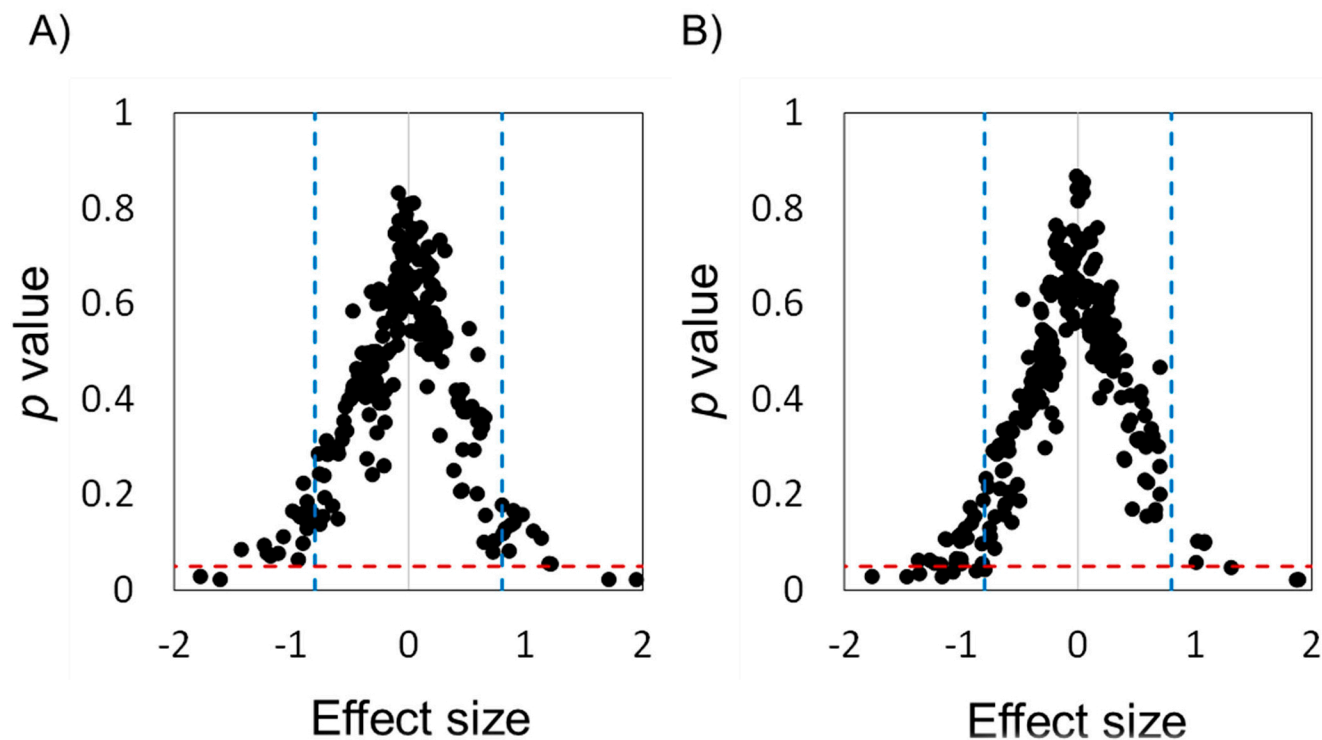

**Figure S6.** Volcano plot comparing the relative abundance of bacterial groups assigned up to the taxonomic level of genus in A) the Ag-NPs amended rhizosphere versus the Ag-NPs amended uncultivated soil and B) the  $\alpha$ -Fe<sub>2</sub>O<sub>3</sub>-NPs amended rhizosphere versus the  $\alpha$ -Fe<sub>2</sub>O<sub>3</sub>-NPs amended uncultivated soil. Details of the figure can be found in Figure S4.

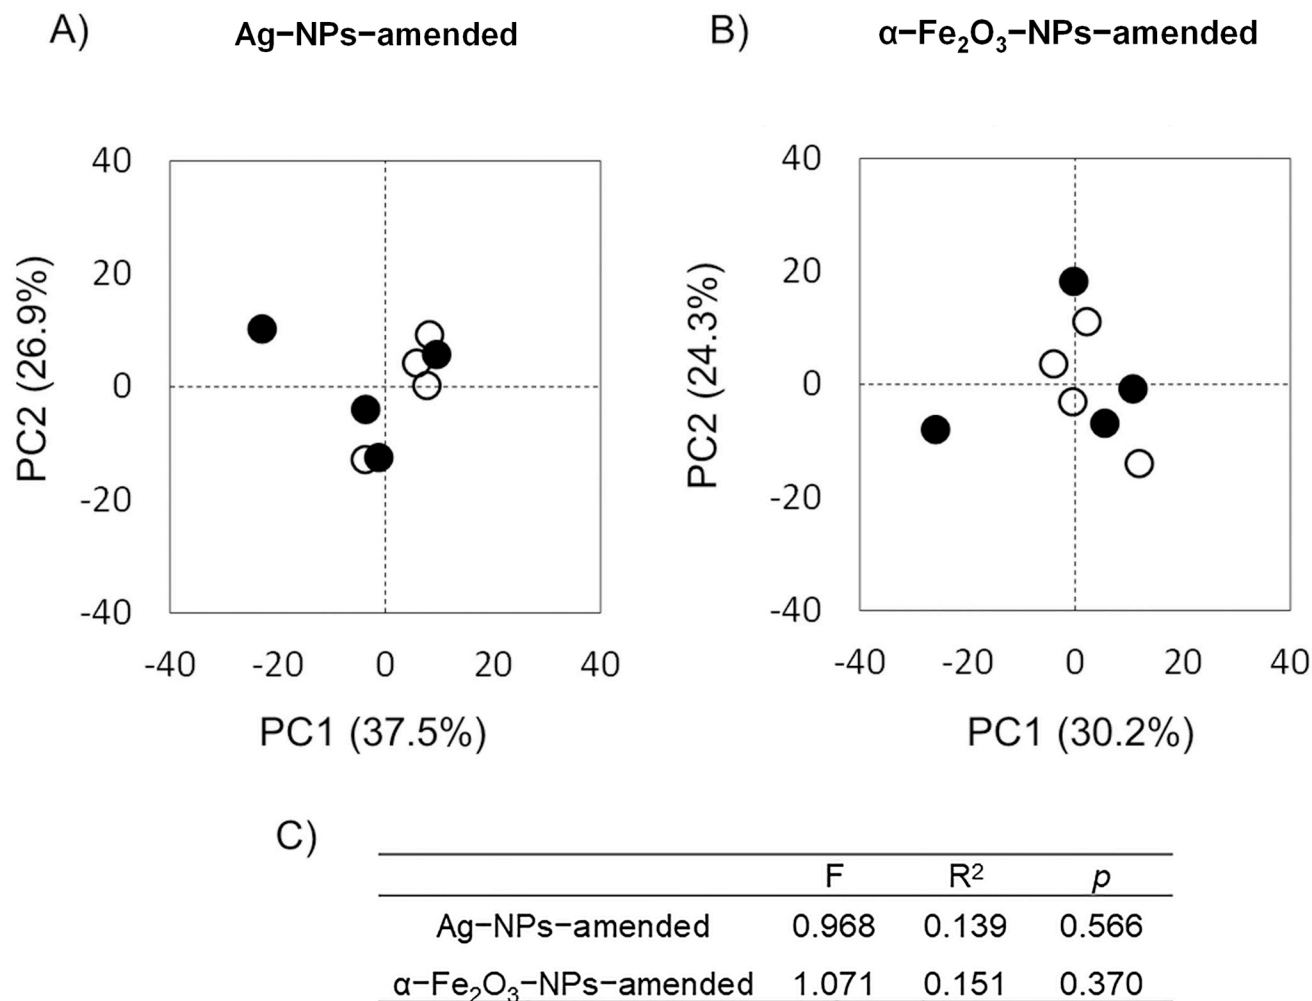

**Figure S7.** Principal component analysis (PCA) with putative metabolic functions in A) Ag-NPs and B)  $\alpha$ -Fe<sub>2</sub>O<sub>3</sub>-NPs amended uncultivated soil (○) and rhizosphere soil (●), and C) permutational analysis of variance (perMANOVA) test to determine the effect of bean (*Phaseolus vulgaris* L.) cultivation on the putative metabolic functions in each nanoparticles amended soil.

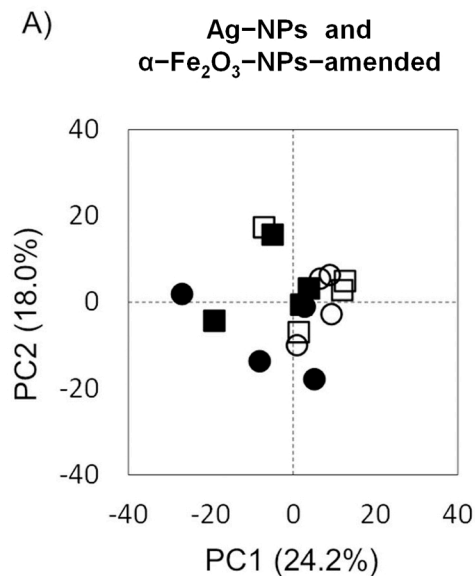

B)

|                   | F     | R <sup>2</sup> | <i>p</i>     |
|-------------------|-------|----------------|--------------|
| Treatment         | 1.212 | 0.080          | 0.224        |
| Plant             | 1.774 | 0.112          | <b>0.038</b> |
| Plant × Treatment | 1.161 | 0.225          | 0.223        |

**Figure S8.** A) Principal component analysis (PCA) with putative metabolic functions in the uncultivated soil amended with Ag-NPs (○), rhizosphere soil amended with Ag-NPs (●), uncultivated soil amended with  $\alpha$ -Fe<sub>2</sub>O<sub>3</sub>-NPs (□), and rhizosphere soil amended with  $\alpha$ -Fe<sub>2</sub>O<sub>3</sub>-NPs (■) and B) perMANOVA test to determine the effect of plant cultivation, nanoparticles application and their interaction.

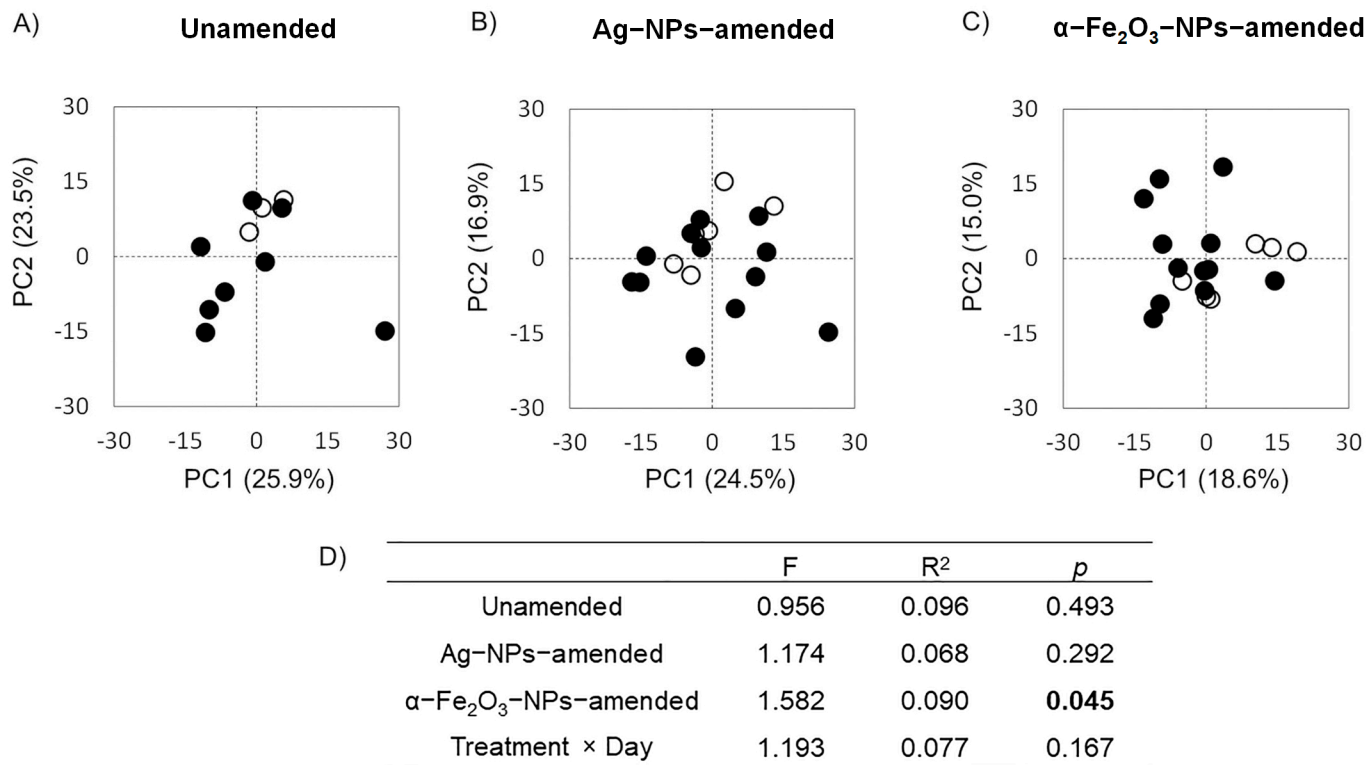

**Figure S9.** Principal component analysis (PCA) with all putative metabolic functions in the A) unamended, and B) Ag-NPs and C)  $\alpha$ -Fe<sub>2</sub>O<sub>3</sub>-NPs amended soil at the onset of the experiment (○) and after 100 days (●), and D) Permutational analysis of variance (perMANOVA) test used to determine the effect of time on the putative metabolic functions.



**Table S1** Methods used to determine soil characteristics.

| Characterization               | Technique used                                                                                                                                                           | Reference |
|--------------------------------|--------------------------------------------------------------------------------------------------------------------------------------------------------------------------|-----------|
| pH                             | A soil sample was mixed with distilled water in a 1:2.5 ratio and pH was determined with a potentiometer HANNA HI 110.                                                   | [18]      |
| Electrolytic conductivity (EC) | A soil sample was mixed with distilled water in ratio 1:5 to determine EC with a conductimeter HANNA HI 2300.                                                            | [19]      |
| Particle size distribution     | Soil particle size distribution was determined by the hydrometer method.                                                                                                 | [20]      |
| Total carbon                   | Total C was determined with a Thermo Scientific™ FlashSmart™ Elemental Analyzer (Waltham, Massachusetts, USA) following the standard protocol given by the manufacturer. |           |
| Total nitrogen                 | Total N was measured by the Kjeldahl method using concentrated H <sub>2</sub> SO <sub>4</sub> , K <sub>2</sub> SO <sub>4</sub> and HgO to digest the sample.             | [21]      |
| Water holding capacity (WHC)   | The WHC was measured on soil samples water-saturated in a funnel and left to stand overnight. The weight of the water retained by the soil was considered the WHC.       |           |

**Table S2** Statistical analysis applied to the data and the package in R used.

| Statistical analysis                                                                               | Comparison                                                                                                                                                                                  | Package used and reference            |
|----------------------------------------------------------------------------------------------------|---------------------------------------------------------------------------------------------------------------------------------------------------------------------------------------------|---------------------------------------|
| clr-transformation                                                                                 | Centred log-ratio transformation as high-throughput data or compositional                                                                                                                   | ALDEx2 (1.18) [33]                    |
| principal component analysis (PCA)                                                                 | Visualize the effect of the application of NPs, the cultivation of beans and the time on bacterial community structure or putative metabolic functions                                      | FactoMineR (2.3.), [34]               |
| perMANOVA                                                                                          | Determine the effect of the application of NPs, the cultivation of beans and the time of exposure, and their interaction on the structure and putative functionality of bacterial community | Vegan (2.5-6), [35]                   |
| permutation test of multivariate analysis of dispersions (PERMDISP)                                | Determine dispersion within treatments                                                                                                                                                      | Vegan (2.5-6), [35, 36]               |
| non-parametric Kruskal Wallis test                                                                 | Determine of the application of NPs or plant on bacterial groups                                                                                                                            | aldex.kw, ALDEx2 (1.18), [33]         |
| effect size (the difference between the groups divided by maximum dispersion within the treatment) | Determine of the application of NPs or plant on bacterial groups. An effect size $\geq  0.8 $ was considered as a large effect.                                                             | aldex.effect, ALDEx2 (1.18), [33, 37] |
| volcano plot                                                                                       | The effect size was plotted versus the expected $p$ -value of the Kruskal-Wallis test for each feature                                                                                      | aldex.ttest, ALDEx2 (1.18), [33, 38]  |

**Table S3** Some morphological characteristics of common bean plants (*Phaseolus vulgaris* L.)

| Treatment                                    | Stem length (cm) | Root length (cm) |
|----------------------------------------------|------------------|------------------|
| Unamended                                    | 173.9 ± 18 a     | 66.5 ± 3.6 a     |
| Ag-NP amended                                | 179.8 ± 16.8 a   | 61.8 ± 6.3 a     |
| α-Fe <sub>2</sub> O <sub>3</sub> -NP amended | 175.6 ± 18.1 a   | 60.7 ± 6.5 a     |

<sup>a</sup> Values with the same letter within a column, i.e. differences between treatments, are not significantly different at  $p < 0.05$

**Table S4** Heavy metal content in the roots and leaves of common bean plants (*Phaseolus vulgaris* L.)

| Treatment                                    | Roots                 |                |             |           |
|----------------------------------------------|-----------------------|----------------|-------------|-----------|
|                                              | Cu                    | Fe             | Mn          | Zn        |
|                                              | (µg g <sup>-1</sup> ) |                |             |           |
| Unamended                                    | 22 ± 3 a              | 15082 ± 2888 a | 402 ± 108 a | 50 ± 8 a  |
| Ag-NP amended                                | 14 ± 2 b              | 7187 ± 1712 b  | 157 ± 39 b  | 32 ± 8 b  |
| α-Fe <sub>2</sub> O <sub>3</sub> -NP amended | 18 ± 5 ab             | 5229 ± 3327 b  | 106 ± 83 b  | 31 ± 6 b  |
|                                              |                       |                |             |           |
| Treatment                                    | Leaves                |                |             |           |
|                                              | Cu                    | Fe             | Mn          | Zn        |
|                                              | (µg g <sup>-1</sup> ) |                |             |           |
| Unamended                                    | 13 ± 3 a              | 718 ± 238 a    | 103 ± 7 a   | 43 ± 6 a  |
| Ag-NP amended                                | 11 ± 2 a              | 485 ± 79 a     | 85 ± 3 b    | 39 ± 10 a |
| α-Fe <sub>2</sub> O <sub>3</sub> -NP amended | 14 ± 5 a              | 839 ± 452 a    | 90 ± 9 ab   | 42 ± 11 a |

<sup>a</sup> Values with the same letter within a column, i.e. differences between treatments, are not significantly different at  $p < 0.05$

**Table S5** Bacterial genera with a large effect size when was applied with Ag-NPs and  $\alpha$ -Fe<sub>2</sub>O<sub>3</sub>-NPs

| <b>Silver nanoparticles amended vs unamended non-rhizosphere soil</b>                                          | <b>Effect size</b> | <b>p value</b> |
|----------------------------------------------------------------------------------------------------------------|--------------------|----------------|
| <i>Flavitalea</i>                                                                                              | <b>1.4</b>         | 0.068          |
| DS-100                                                                                                         | <b>1.1</b>         | 0.112          |
| 67-14                                                                                                          | <b>-1.4</b>        | 0.051          |
| <i>Allorhizobium-Neorhizobium-Pararhizobium-Rhizobium</i>                                                      | <b>-1.1</b>        | 0.098          |
| <i>Bradyrhizobium</i>                                                                                          | <b>-1.0</b>        | 0.172          |
| <i>Haliangium</i>                                                                                              | <b>-0.9</b>        | 0.128          |
| <b>Silver nanoparticles amended vs unamended rhizosphere soil</b>                                              |                    |                |
| <i>Craurococcus-Caldovatus</i>                                                                                 | <b>0.9</b>         | 0.130          |
| <i>Nocardioides</i>                                                                                            | <b>-2.3</b>        | 0.022          |
| <i>Ohtaekwangia</i>                                                                                            | <b>-1.9</b>        | 0.022          |
| <i>Candidatus_Alysiosphaera</i>                                                                                | <b>-1.0</b>        | 0.129          |
| <i>Turicibacter</i>                                                                                            | <b>-1.0</b>        | 0.120          |
| <b>Unamended non-rhizosphere soil vs <math>\alpha</math>-Fe<sub>2</sub>O<sub>3</sub> nanoparticles amended</b> |                    |                |
| <i>Hafnia-Obesumbacterium</i>                                                                                  | <b>2.5</b>         | 0.021          |
| <i>Massilia</i>                                                                                                | <b>1.3</b>         | 0.097          |
| RCP2-54                                                                                                        | <b>1.2</b>         | 0.056          |
| <i>Stenotrophomonas</i>                                                                                        | <b>1.1</b>         | 0.102          |
| <i>Pseudenhymyxa</i>                                                                                           | <b>1.0</b>         | 0.096          |
| <i>Sphingomonas</i>                                                                                            | <b>0.9</b>         | 0.142          |
| <i>Amycolatopsis</i>                                                                                           | <b>-1.2</b>        | 0.083          |
| bacteriap25                                                                                                    | <b>-1.0</b>        | 0.084          |
| <i>Gaiella</i>                                                                                                 | <b>-1.0</b>        | 0.140          |
| <i>Rubrobacter</i>                                                                                             | <b>-0.9</b>        | 0.173          |
| KD4-96                                                                                                         | <b>-0.9</b>        | 0.150          |
| <b>Unamended rhizosphere soil vs <math>\alpha</math>-Fe<sub>2</sub>O<sub>3</sub> nanoparticles amended</b>     |                    |                |
| <i>Nocardioides</i>                                                                                            | <b>2.3</b>         | 0.021          |
| bacteriap25                                                                                                    | <b>0.9</b>         | 0.175          |
| <i>Turicibacter</i>                                                                                            | <b>0.9</b>         | 0.122          |
| <i>Flavitalea</i>                                                                                              | <b>0.9</b>         | 0.052          |
| <i>Arenimonas</i>                                                                                              | <b>0.8</b>         | 0.154          |
| <i>Solirubrobacter</i>                                                                                         | <b>-1.0</b>        | 0.106          |
| JGI_0001001-H03                                                                                                | <b>-1.0</b>        | 0.197          |
| NB1-j                                                                                                          | <b>-0.9</b>        | 0.090          |

**Table S6** *p* values obtained from permutation test of multivariate homogeneity of groups dispersions

| <b>Nanoparticles application</b>                                   | <b><i>p</i> value</b> |
|--------------------------------------------------------------------|-----------------------|
| <i>Non-rhizosphere</i>                                             | 0.312                 |
| Ag-NPs amended vs unamended                                        | 0.356                 |
| $\alpha$ -Fe <sub>2</sub> O <sub>3</sub> -NPs amended vs unamended | 0.108                 |
| Ag-NPs vs $\alpha$ -Fe <sub>2</sub> O <sub>3</sub> -NPs            | 0.698                 |
| <i>Rhizosphere</i>                                                 | 0.808                 |
| Ag-NPs amended vs unamended                                        | 0.739                 |
| $\alpha$ -Fe <sub>2</sub> O <sub>3</sub> -NPs amended vs unamended | 0.325                 |
| Ag-NPs vs $\alpha$ -Fe <sub>2</sub> O <sub>3</sub> -NPs            | 0.831                 |
| <i>Uncultivated</i>                                                | 0.854                 |
| Ag-NPs vs $\alpha$ -Fe <sub>2</sub> O <sub>3</sub> -NPs            | 0.864                 |
| <b>Plant cultivation</b>                                           |                       |
| Rhizosphere vs uncultivated                                        | 0.897                 |
| <b>Time</b>                                                        |                       |
| Unamended                                                          | 0.212                 |
| Ag-NPs amended                                                     | 0.219                 |
| $\alpha$ -Fe <sub>2</sub> O <sub>3</sub> -NPs amended              | 0.844                 |
